# Supplementary material for: Formation of negative ions from cobalt tricarbonyl nitrosyl Co(CO)3NO clusters
Source: Royal Society of Chemistry journal article supplement (doi:10.1039/d3cp05601e), 2024-01-01
Supplement: d3cp05601e2.pdf [file d3cp05601e2.pdf]

## **Formation of negative ions from cobalt tricarbonyl nitrosyl $\text{Co}(\text{CO})_3\text{NO}$ clusters**

Dušan Mészáros,<sup>a</sup> Štefan Matejčík<sup>a</sup> and Peter Papp<sup>a</sup>

<sup>a</sup>Department of Experimental Physics, Faculty of Mathematics, Physics and Informatics, Comenius University in Bratislava, Mlynská dolina F2, 842 48 Bratislava, Slovakia, e-mail: [peter.papp@uniba.sk](mailto:peter.papp@uniba.sk)

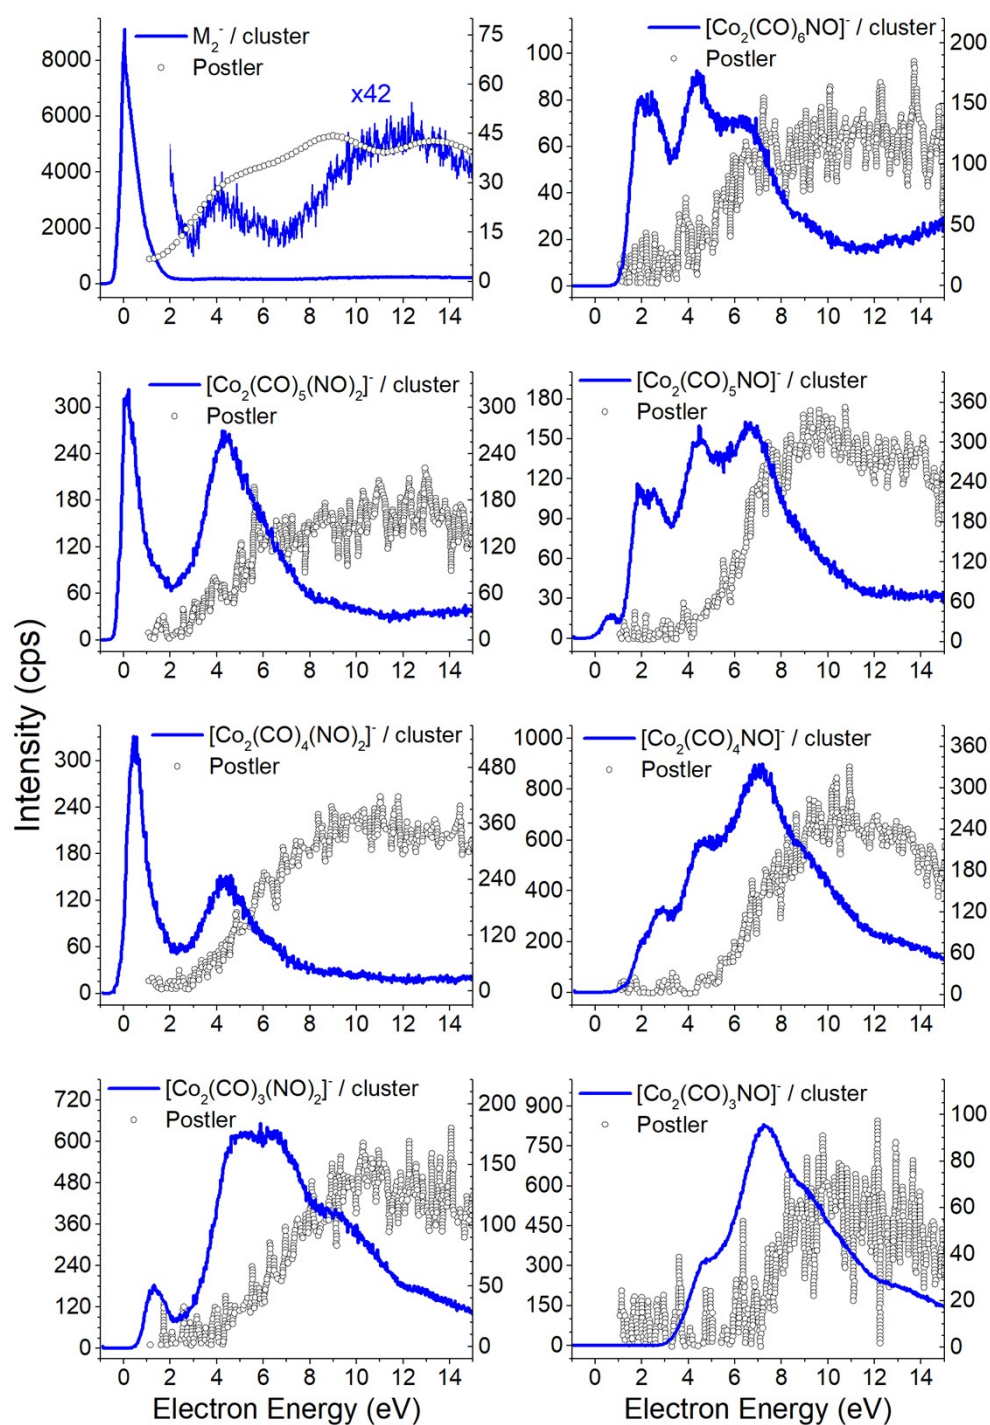

**Figure ESI 1** The molecular dimer  $[\text{Co}(\text{CO})_3\text{NO}_2]^-$  (labelled as  $\text{M}_2^-$ ) and the associated clusters of one molecule (M) with the DEA products  $[\text{Co}(\text{CO})_2\text{NO}]^- \dots \text{Co}^-$  obtained from CLUSTER-ILN measurements (blue lines, y-axes on left) compared with the He clusters data (grey, y-axis on right, taken from J. Postler, M. Renzler, A. Kaiser, S. E. Huber, M. Probst, P. Scheier and A. M. Ellis, *J. Phys. Chem. C*, 2015, **119**, 20917–20922).

**Table ESI 1** Reaction energies ( $\Delta H$ ) in eV evaluated from CBS-QB3 enthalpies for neutral dissociations as  $\Delta H = H([neutral\ fragment]) + \sum H(neutral\ products) - H(Co(CO)_3NO)$  as well as for reactions leading to anionic products via DEA as  $\Delta H = H([anionic\ fragment]) + \sum H(neutral\ products) - H(Co(CO)_3NO)$ . Last line corresponds to formation of neutral or ionic  $Co(CO)_4$  via interaction of two  $Co(CO)_3NO$  molecules.

|                                           | $\Delta H/eV$              |       | $\Delta H/eV$                           |       |
|-------------------------------------------|----------------------------|-------|-----------------------------------------|-------|
|                                           | [neutral fragments]        |       | [anion fragments]                       |       |
| <b>Co(CO)<sub>3</sub>NO</b>               |                            |       |                                         |       |
| <b>1.1</b> → CO                           | + [Co(CO) <sub>2</sub> NO] | 1.32  | + [Co(CO) <sub>2</sub> NO] <sup>-</sup> | -0.01 |
| <b>1.2</b> → NO                           | + [Co(CO) <sub>3</sub> ]   | 2.58  | + [Co(CO) <sub>3</sub> ] <sup>-</sup>   | 0.85  |
| <b>1.3</b> → CO + NO                      | + [Co(CO) <sub>2</sub> ]   | 4.17  | + [Co(CO) <sub>2</sub> ] <sup>-</sup>   | 1.32  |
| <b>1.4</b> → 2 CO                         | + [Co(CO)NO]               | 3.26  | + [Co(CO)NO] <sup>-</sup>               | 1.68  |
| <b>1.5</b> → 2 CO + NO                    | + [CoCO]                   | 5.61  | + [CoCO] <sup>-</sup>                   | 4.82  |
| <b>1.6</b> → 3 CO                         | + [CoNO]                   | 5.10  | + [CoNO] <sup>-</sup>                   | 4.14  |
| <b>1.7</b> → 3 CO + NO                    | + [Co]                     | 6.63  | + [Co] <sup>-</sup>                     | 5.77  |
| <b>1.8</b> → CO + O                       | + [Co(CO) <sub>2</sub> N]  | 8.06  | + [Co(CO) <sub>2</sub> N] <sup>-</sup>  | 6.13  |
| <b>1.9</b> → CO + O                       | + [Co(CO)(NO)C]            | 10.73 | + [Co(CO)(NO)C] <sup>-</sup>            | 8.87  |
| <b>1.10</b> → CO + C                      | + [Co(CO)(NO)O]            | 10.23 | + [Co(CO)(NO)O] <sup>-</sup>            | 8.63  |
| <b>2 Co(CO)<sub>3</sub>NO</b>             |                            |       |                                         |       |
| <b>1.11</b> → Co(CO) <sub>2</sub> NO + NO | + [Co(CO) <sub>4</sub> ]   | 2.30  | + [Co(CO) <sub>4</sub> ] <sup>-</sup>   | -0.53 |

**Table ESI 2** Reaction energies ( $\Delta H$ ) in eV evaluated from CBS-QB3 enthalpies for dimer, where  $\Delta H = \Sigma x H(\text{CO}) + \Sigma H[\text{Co}_2(\text{CO})_{6-x}(\text{NO})_2]^- - 2 H(\text{Co}(\text{CO})_3\text{NO})$ , for  $x=0, 1, 2, 3, 4, 5$ .

|                                   |                                                                       | Ion+neutral pair<br>considered in cluster                                            | Neutral<br>fragments | $\Delta H/\text{eV}$ |
|-----------------------------------|-----------------------------------------------------------------------|--------------------------------------------------------------------------------------|----------------------|----------------------|
| <b>2 Co(CO)<sub>3</sub>NO + e</b> |                                                                       |                                                                                      |                      |                      |
| <b>2.1</b>                        | $\rightarrow [\text{Co}_2(\text{CO})_6(\text{NO})_2]^-$               | $\rightarrow [2\text{Co}(\text{CO})_3\text{NO}]^- + \text{Co}(\text{CO})_3\text{NO}$ |                      | -0.73                |
| <b>2.2</b>                        | $\rightarrow [\text{Co}_2(\text{CO})_5(\text{NO})_2]^- + \text{CO}$   | $\rightarrow [\text{Co}(\text{CO})_2\text{NO}]^- + \text{Co}(\text{CO})_3\text{NO}$  | + CO                 | -0.11                |
| <b>2.3</b>                        |                                                                       | $\rightarrow [\text{Co}(\text{CO})_3\text{NO}]^- + \text{Co}(\text{CO})_2\text{NO}$  | + CO                 | 0.59                 |
| <b>2.4</b>                        | $\rightarrow [\text{Co}_2(\text{CO})_4(\text{NO})_2]^- + 2 \text{CO}$ | $\rightarrow [\text{Co}(\text{CO})\text{NO}]^- + \text{Co}(\text{CO})_3\text{NO}$    | + 2 CO               | 1.68                 |
| <b>2.5</b>                        |                                                                       | $\rightarrow [\text{Co}(\text{CO})_3\text{NO}]^- + \text{Co}(\text{CO})\text{NO}$    | + 2 CO               | 2.53                 |
| <b>2.6</b>                        |                                                                       | $\rightarrow [\text{Co}(\text{CO})_2\text{NO}]^- + \text{Co}(\text{CO})_2\text{NO}$  | + 2 CO               | 1.31                 |
| <b>2.7</b>                        | $\rightarrow [\text{Co}_2(\text{CO})_3(\text{NO})_2]^- + 3 \text{CO}$ | $\rightarrow [\text{CoNO}]^- + \text{Co}(\text{CO})_3\text{NO}$                      | + 3 CO               | 4.14                 |
| <b>2.8</b>                        |                                                                       | $\rightarrow [\text{Co}(\text{CO})_3\text{NO}]^- + \text{CoNO}$                      | + 3 CO               | 4.37                 |
| <b>2.9</b>                        |                                                                       | $\rightarrow [\text{Co}(\text{CO})_2\text{NO}]^- + \text{Co}(\text{CO})\text{NO}$    | + 3 CO               | 3.25                 |
| <b>2.10</b>                       |                                                                       | $\rightarrow [\text{Co}(\text{CO})\text{NO}]^- + \text{Co}(\text{CO})_2\text{NO}$    | + 3 CO               | 3.00                 |
| <b>2.11</b>                       | $\rightarrow [\text{Co}_2(\text{CO})_2(\text{NO})_2]^- + 4 \text{CO}$ | $\rightarrow [\text{CoNO}]^- + \text{Co}(\text{CO})_2\text{NO}$                      | + 4 CO               | 5.47                 |
| <b>2.12</b>                       |                                                                       | $\rightarrow [\text{Co}(\text{CO})_2\text{NO}]^- + \text{CoNO}$                      | + 4 CO               | 5.09                 |
| <b>2.13</b>                       |                                                                       | $\rightarrow [\text{Co}(\text{CO})\text{NO}]^- + \text{Co}(\text{CO})\text{NO}$      | + 4 CO               | 4.94                 |
| <b>2.14</b>                       |                                                                       | $\rightarrow [\text{Co}(\text{CO})_2]^- + \text{Co}(\text{NO})_2$                    | + 4 CO               | 3.74                 |
| <b>2.15</b>                       | $\rightarrow [\text{Co}_2(\text{CO})(\text{NO})_2]^- + 5 \text{CO}$   | $\rightarrow [\text{CoNO}]^- + \text{Co}(\text{CO})\text{NO}$                        | + 5 CO               | 7.40                 |
| <b>2.16</b>                       |                                                                       | $\rightarrow [\text{Co}(\text{CO})\text{NO}]^- + \text{CoNO}$                        | + 5 CO               | 6.79                 |

**Table ESI 3** Reaction energies ( $\Delta H$ ) in eV evaluated from CBS-QB3 enthalpies for dimer, where  $\Delta H = \sum x H(\text{CO}) + H(\text{NO}) + \sum H[\text{Co}_2(\text{CO})_{6-x}\text{NO}]^- - 2 H(\text{Co}(\text{CO})_3\text{NO})$ , for  $x=0, 1, 2, 3, 4, 5$ .

|                                         |                                                                               | Ion+neutral pair<br>considered in cluster                                  | Neutral<br>fragments | $\Delta H/\text{eV}$ |
|-----------------------------------------|-------------------------------------------------------------------------------|----------------------------------------------------------------------------|----------------------|----------------------|
| 2 $\text{Co}(\text{CO})_3\text{NO} + e$ |                                                                               |                                                                            |                      |                      |
| <b>3.1</b>                              | $\rightarrow [\text{Co}_2(\text{CO})_6\text{NO}]^- + \text{NO}$               | $\rightarrow [\text{Co}(\text{CO})_3]^- + \text{Co}(\text{CO})_3\text{NO}$ | + NO                 | 0.85                 |
| <b>3.2</b>                              |                                                                               | $\rightarrow [\text{Co}(\text{CO})_3\text{NO}]^- + \text{Co}(\text{CO})_3$ | + NO                 | 1.85                 |
| <b>3.3</b>                              |                                                                               | $\rightarrow [\text{Co}(\text{CO})_2\text{NO}]^- + \text{Co}(\text{CO})_4$ | + NO                 | 2.30                 |
| <b>3.4</b>                              |                                                                               | $\rightarrow [\text{Co}(\text{CO})_4]^- + \text{Co}(\text{CO})_2\text{NO}$ | + NO                 | -0.55                |
| <b>3.5</b>                              | $\rightarrow [\text{Co}_2(\text{CO})_5\text{NO}]^- + \text{CO} + \text{NO}$   | $\rightarrow [\text{Co}(\text{CO})_2]^- + \text{Co}(\text{CO})_3\text{NO}$ | + CO + NO            | 1.32                 |
| <b>3.6</b>                              |                                                                               | $\rightarrow [\text{Co}(\text{CO})_3\text{NO}]^- + \text{Co}(\text{CO})_2$ | + CO + NO            | 3.44                 |
| <b>3.7</b>                              |                                                                               | $\rightarrow [\text{Co}(\text{CO})_2\text{NO}]^- + \text{Co}(\text{CO})_3$ | + CO + NO            | 2.57                 |
| <b>3.8</b>                              |                                                                               | $\rightarrow [\text{Co}(\text{CO})_3]^- + \text{Co}(\text{CO})_2\text{NO}$ | + CO + NO            | 2.17                 |
| <b>3.9</b>                              |                                                                               | $\rightarrow [\text{Co}(\text{CO})_4]^- + \text{Co}(\text{CO})\text{NO}$   | + CO + NO            | 1.41                 |
| <b>3.10</b>                             |                                                                               | $\rightarrow [\text{Co}(\text{CO})\text{NO}]^- + \text{Co}(\text{CO})_4$   | + CO + NO            | 2.66                 |
| <b>3.11</b>                             | $\rightarrow [\text{Co}_2(\text{CO})_4\text{NO}]^- + 2 \text{CO} + \text{NO}$ | $\rightarrow [\text{CoCO}]^- + \text{Co}(\text{CO})_3\text{NO}$            | + 2CO + NO           | 4.82                 |
| <b>3.12</b>                             |                                                                               | $\rightarrow [\text{Co}(\text{CO})_3\text{NO}]^- + \text{CoCO}$            | + 2CO + NO           | 4.88                 |
| <b>3.13</b>                             |                                                                               | $\rightarrow [\text{Co}(\text{CO})_2\text{NO}]^- + \text{Co}(\text{CO})_2$ | + 2CO + NO           | 4.16                 |
| <b>3.14</b>                             |                                                                               | $\rightarrow [\text{Co}(\text{CO})_2]^- + \text{Co}(\text{CO})_2\text{NO}$ | + 2CO + NO           | 2.64                 |
| <b>3.15</b>                             |                                                                               | $\rightarrow [\text{Co}(\text{CO})_3]^- + \text{Co}(\text{CO})\text{NO}$   | + 2CO + NO           | 4.11                 |
| <b>3.16</b>                             |                                                                               | $\rightarrow [\text{Co}(\text{CO})\text{NO}]^- + \text{Co}(\text{CO})_3$   | + 2CO + NO           | 4.26                 |
| <b>3.17</b>                             |                                                                               | $\rightarrow [\text{CoNO}]^- + \text{Co}(\text{CO})_4$                     | + 2CO + NO           | 5.13                 |
| <b>3.18</b>                             |                                                                               | $\rightarrow [\text{Co}(\text{CO})_4]^- + \text{CoNO}$                     | + 2CO + NO           | 3.25                 |
| <b>3.19</b>                             | $\rightarrow [\text{Co}_2(\text{CO})_3\text{NO}]^- + 3 \text{CO} + \text{NO}$ | $\rightarrow [\text{Co}]^- + \text{Co}(\text{CO})_3\text{NO}$              | + 3CO + NO           | 5.77                 |
| <b>3.20</b>                             |                                                                               | $\rightarrow [\text{Co}(\text{CO})_3\text{NO}]^- + \text{Co}$              | + 3CO + NO           | 5.91                 |
| <b>3.21</b>                             |                                                                               | $\rightarrow [\text{Co}(\text{CO})_2\text{NO}]^- + \text{CoCO}$            | + 3CO + NO           | 5.60                 |
| <b>3.22</b>                             |                                                                               | $\rightarrow [\text{CoCO}]^- + \text{Co}(\text{CO})_2\text{NO}$            | + 3CO + NO           | 6.14                 |
| <b>3.23</b>                             |                                                                               | $\rightarrow [\text{Co}(\text{CO})_2]^- + \text{Co}(\text{CO})\text{NO}$   | + 3CO + NO           | 4.58                 |
| <b>3.24</b>                             |                                                                               | $\rightarrow [\text{Co}(\text{CO})\text{NO}]^- + \text{Co}(\text{CO})_2$   | + 3CO + NO           | 5.85                 |
| <b>3.25</b>                             |                                                                               | $\rightarrow [\text{CoNO}]^- + \text{Co}(\text{CO})_3$                     | + 3CO + NO           | 6.73                 |
| <b>3.26</b>                             |                                                                               | $\rightarrow [\text{Co}(\text{CO})_3]^- + \text{CoNO}$                     | + 3CO + NO           | 5.95                 |
| <b>3.27</b>                             | $\rightarrow [\text{Co}_2(\text{CO})_2\text{NO}]^- + 4 \text{CO} + \text{NO}$ | $\rightarrow [\text{Co}]^- + \text{Co}(\text{CO})_2\text{NO}$              | 4 CO + NO            | 7.09                 |
| <b>3.28</b>                             |                                                                               | $\rightarrow [\text{Co}(\text{CO})_2\text{NO}]^- + \text{Co}$              | 4 CO + NO            | 6.62                 |
| <b>3.29</b>                             |                                                                               | $\rightarrow [\text{Co}(\text{CO})\text{NO}]^- + \text{CoCO}$              | 4 CO + NO            | 7.29                 |
| <b>3.30</b>                             |                                                                               | $\rightarrow [\text{CoCO}]^- + \text{Co}(\text{CO})\text{NO}$              | 4 CO + NO            | 8.08                 |
| <b>3.31</b>                             |                                                                               | $\rightarrow [\text{Co}(\text{CO})_2]^- + \text{CoNO}$                     | 4 CO + NO            | 6.42                 |
| <b>3.32</b>                             |                                                                               | $\rightarrow [\text{CoNO}]^- + \text{Co}(\text{CO})_2$                     | 4 CO + NO            | 8.31                 |
| <b>3.33</b>                             | $\rightarrow [\text{Co}_2(\text{CO})\text{NO}]^- + 5 \text{CO} + \text{NO}$   | $\rightarrow [\text{Co}]^- + \text{Co}(\text{CO})\text{NO}$                | 5 CO + NO            | 9.03                 |
| <b>3.34</b>                             |                                                                               | $\rightarrow [\text{Co}(\text{CO})\text{NO}]^- + \text{Co}$                | 5 CO + NO            | 8.31                 |
| <b>3.35</b>                             |                                                                               | $\rightarrow [\text{CoCO}]^- + \text{CoNO}$                                | 5 CO + NO            | 9.92                 |
| <b>3.36</b>                             |                                                                               | $\rightarrow [\text{CoNO}]^- + \text{CoCO}$                                | 5 CO + NO            | 9.76                 |

**Table ESI 4** Enthalpies of formation  $\Delta_f H^\circ(298.15\text{ K})$  in kJ/mol evaluated from CBS-QB3 Energy, Zero Point Energy, Thermal correction to Enthalpy and the  $\Delta_f H^\circ(0\text{ K})$  of elements taken from JANAF/NIST database [Chase Jr, M. W. (American Chemical Society, 1998, DOI: 10.18434/T42S31), <https://srd.nist.gov/JPCRD/jpcrdM9.pdf>]

| molecule,<br>fragment  | $\Delta_f H^\circ(298.15\text{ K})$ | JANAF/NIST | $\Delta_f H^\circ(298.15\text{ K})$ | Electron Affinity<br>[eV] |
|------------------------|-------------------------------------|------------|-------------------------------------|---------------------------|
|                        | neutral                             |            | anion                               |                           |
| Co(CO) <sub>3</sub> NO | -411.93                             | -          | -488.06                             | 0.79                      |
| Co(CO) <sub>3</sub>    | -267.26                             | -          | -435.55                             | 1.74                      |
| Co(CO) <sub>2</sub> NO | -185.46                             | -          | -316.95                             | 1.36                      |
| Co(CO) <sub>2</sub>    | -14.00                              | -          | -289.39                             | 2.85                      |
| Co(CO)NO               | 102.03                              | -          | -55.37                              | 1.63                      |
| CoCO                   | 226.56                              | -          | 147.06                              | 0.82                      |
| CoNO                   | 376.56                              |            | 282.84                              | 0.97                      |
| CO                     | -108.39                             | -110.53    |                                     |                           |
| NO                     | 93.13                               | 90.29      |                                     |                           |
