# Supplementary figures and images for: Formation of negative ions from cobalt tricarbonyl nitrosyl Co(CO)3NO clusters
Source: Royal Society of Chemistry journal article supplement (doi:10.1039/d3cp05601e), 2024-01-01

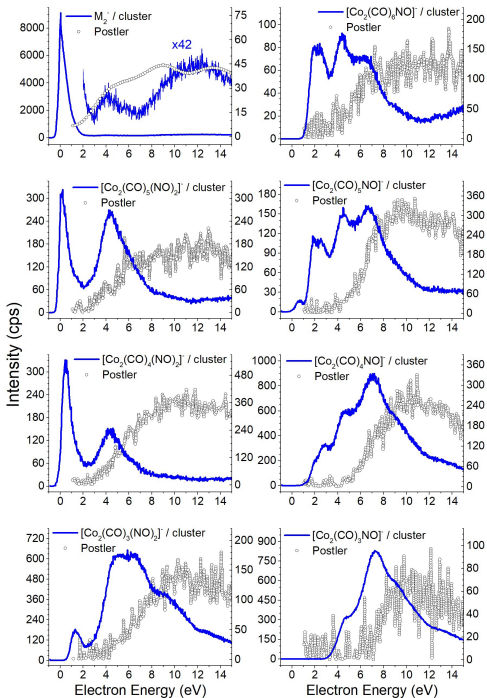

Supplement: d3cp05601e4.pdf [file d3cp05601e4.pdf]
